# Supplementary material for: Phenotypic, Nutritional, and Antioxidant Characterization of Blanched Oenanthe javanica for Preferable Cultivar
Source: Frontiers journal article supplement (doi:10.3389/fpls.2021.639639), 2021-02-19
Supplement: Image_1.pdf [file Image_1.pdf]

### Supplementary Figure 1

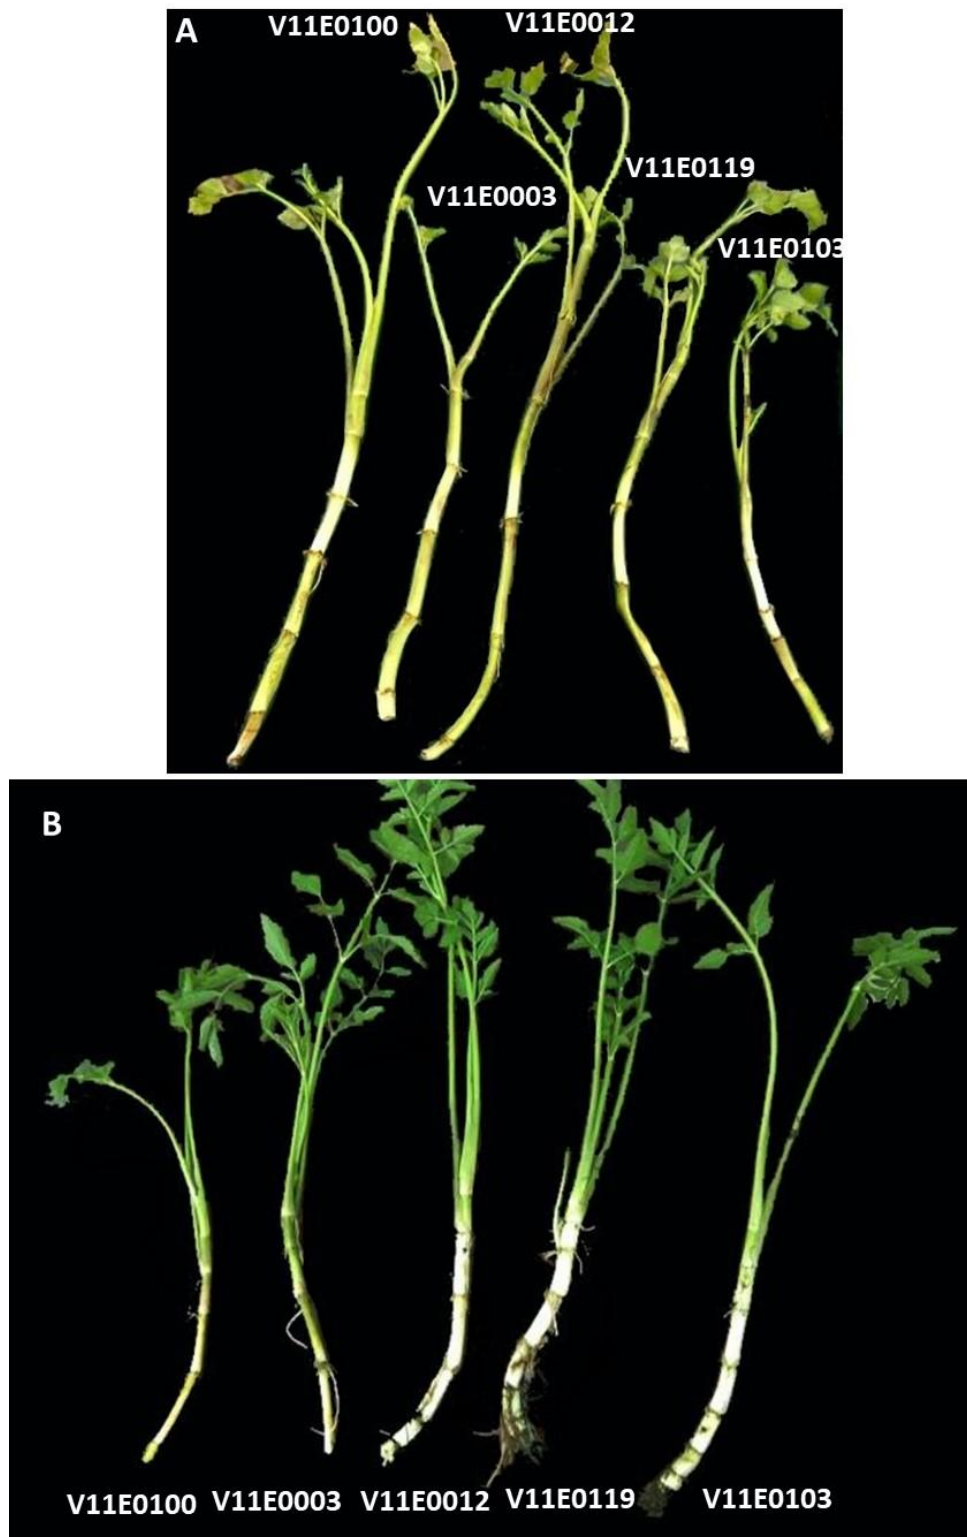

**Figure S1** | Effect of blanching on the five cultivars of water dropwort. A) Effect of mid-blanching (after 20 days), and B) effect of post-blanching on the water dropwort (after 40 days).
